# Supplementary material for: Toxicity of Naphthalene and Benzene on Tribollium castaneum Herbst
Source: PubMed Central journal article supplement (PMC5486353; doi:10.3390/ijerph14060667), 2017-06-21
Supplement: ijerph-14-00667-s001.pdf [file ijerph-14-00667-s001.pdf]

**Table S1.** Primer sequences used for genes investigated by RT-PCR.

| <b>Gene name</b>                             | <b>Gene Symbol</b> | <b>Entrez gene ID</b> | <b>Forward (5'-3')</b> | <b>Reverse (5'-3')</b>   | <b>Amplicon Size (pb)</b> |
|----------------------------------------------|--------------------|-----------------------|------------------------|--------------------------|---------------------------|
| <b>Target Genes</b>                          |                    |                       |                        |                          |                           |
| Acetylcholinesterase                         | AchE1              | HQ260968.1            | CCGTTTCGTCCCAGTCATTG   | AGTAGTAGCCTTCTTCTGTGTTAG | 121                       |
| GABA-gated anion channel splice variant 3a6a | RDL                | NM_001114292.1        | ACTTGGGCGACGTCAACATA   | ACGTGAAATCCATCTGGACC     | 159                       |
| GABA-gated ion channel                       | GRD                | NM_001114300.1        | GGTCTCCTTCTGGCTGAACC   | TGGACCACAGCGAACTGAAT     | 198                       |
| Glutamate-gated chloride channel             | GluCl              | NM_001114304.1        | TGAATGGCACAGATGGTCCC   | CCAGACTCGACTGGCTTCAG     | 194                       |
| Histamine-gated chloride channel 2           | HisCl2             | NM_001109951.1        | TGGATGTCCAGTTGTTCCGGT  | TGTGGCTGAATAGGCAAGTCAT   | 176                       |
| Hormone receptor in 39-like protein          | HR39               | XR_043083.1           | CGACCGTCGACTGTACAAAA   | AGTCGACATGGAACGGAAAC     | 145                       |
| Ultraspiracle nuclear receptor               | USP                | NM_001114294.2        | GATGCAAGCACAGGATGCTA   | CCGACTTTATCCCTCGAACA     | 206                       |
| Ecdysone receptor                            | EcR                | NM_001141918.1        | GATGGATGGCGAAGATCAGT   | ACTTCGCTGGAACATGCTTT     | 162                       |
| Chitin synthase 2                            | CHS2               | AY295879.1            | TCCTCCTAGTCATCTACTCG   | TTATGCCTCCACGTCTGACC     | 2289                      |
| Cytochrome P450 6BQ8                         | CYP6B Q8           | XM_970474.1           | CTATCCCCAACACTTCCATTC  | CTGCGGTCAGTCCAACCTTTAC   | 237                       |
| Glutathione S-Transferase                    | GST                | XM_964053.1           | ATTCGATTGCCCGATATTTG   | CGTTGAAGGTGTCCACAATG     | 96                        |
| Cu/Zn-Superoxide Dismutase                   | SOD                | XM_963191.2           | CCATGGAAAGGATCATGGAG   | GGCTTCGATATTCCCCAAAT     | 70                        |
| <b>Housekeeping genes</b>                    |                    |                       |                        |                          |                           |
| Ribosomal protein Rp49                       | Rp49               | XM_964471.2           | TGGCAAACCTCAAACGCAACT  | AGCGCCTACGAACCCTGTT      | 62                        |
| Ribosomal protein RpS18                      | RpS18              | XM_968539.2           | CGAAGAGGTCGAGAAAATCG   | CGTGGTCTTGGTGTGTTGAC     | 235                       |

**Table S2.** Compounds identified by GC/MS in *T. castaneum* unexposed or exposed to nap balls (naphthalin).

| Peak | Compound                               | Retention time (min) | Area (%)     |              |
|------|----------------------------------------|----------------------|--------------|--------------|
|      |                                        |                      | Unexposed    | Exposed      |
| 1    | 1,3-bis(3-phenoxyphenoxy)benzene       | 1.50                 | <b>4.95</b>  | <b>25.75</b> |
| 2    | 14-Methylpentadecanoic acid            | 29.00                | 19.68        | 20.26        |
| 3    | 9,12-octadecadienoic acid methyl ester | 32.04                | <b>58.86</b> | <b>30.31</b> |
| 4    | Unidentified                           | 36.09                | 0.79         | 9.45         |
| 5    | 1-Heptadecanamine                      | 38.22                | 15.58        | 14.12        |
|      | Others                                 | ---                  | 0.14         | 0.11         |

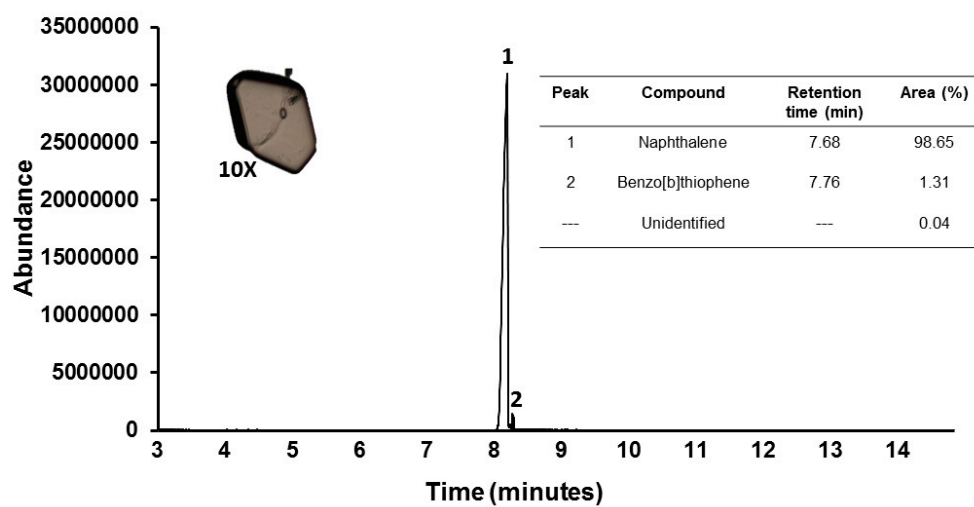

Figure S1. Typical GC/MS chromatogram of nap balls (naphthalin).
